# Supplementary material
Source: publisher figshare collection journal article supplement (https://acs.figshare.com/ndownloader/files/13376333)
Supplement: Supplementary file 1 [file 13376333]

## Supporting Information

### Controllable Preparation and Catalytic Performance of Magnetic $\text{Fe}_3\text{O}_4@\text{CeO}_2$ -Polysulfone Nano-composites with Core-shell Structure

Juan Wei, Hongbao Yao, Yujun Wang\*, and Guangsheng Luo

State Key Lab of Chemical Engineering, Department of Chemical Engineering, Tsinghua University,  
Beijing 100084, China

\* Corresponding author\*: Tel: 86-10-62798447, Fax: 86-10-62770304

E-mail: wangyujun@mail.tsinghua.edu.cn.

## 1. Characterization of the Fe<sub>3</sub>O<sub>4</sub> cores and pure CeO<sub>2</sub> particles

Fe<sub>3</sub>O<sub>4</sub> particles synthesized by solvothermal method have relatively uniform size and shape (Figure S1a-c), which benefited the subsequent wrapping steps. By surveying more than 100 nanoparticles on the SEM image through Digital Micrograph Software, it shows that the average diameter of the cores is 190nm. From the XRD pattern (Figure S1d), the characteristic peaks of the core particles corresponding to (220), (311), (400), (511), (440) are located at  $2\theta = 30.095, 35.422, 43.052, 56.942, 62.515^\circ$  respectively, which fits in the cubic Fe<sub>3</sub>O<sub>4</sub> crystal(Fd-3m(227)) in PDF database. The XRD peaks of Fe<sub>3</sub>O<sub>4</sub> were not so obvious because the surface of Fe<sub>3</sub>O<sub>4</sub> particles was modified by citrate. Besides, the characteristic peaks of pure CeO<sub>2</sub> synthesized by hydrothermal method under the same synthesis conditions with Fe<sub>3</sub>O<sub>4</sub>@CeO<sub>2</sub> corresponding to (111), (200), (220), (311), (222), (400), (331) are located at  $2\theta = 28.554, 33.081, 47.478, 56.334, 59.085, 69.4, 76.698^\circ$ , respectively. These sharp peaks demonstrate the relatively complete cubic fluorite structure of the pure CeO<sub>2</sub> samples.

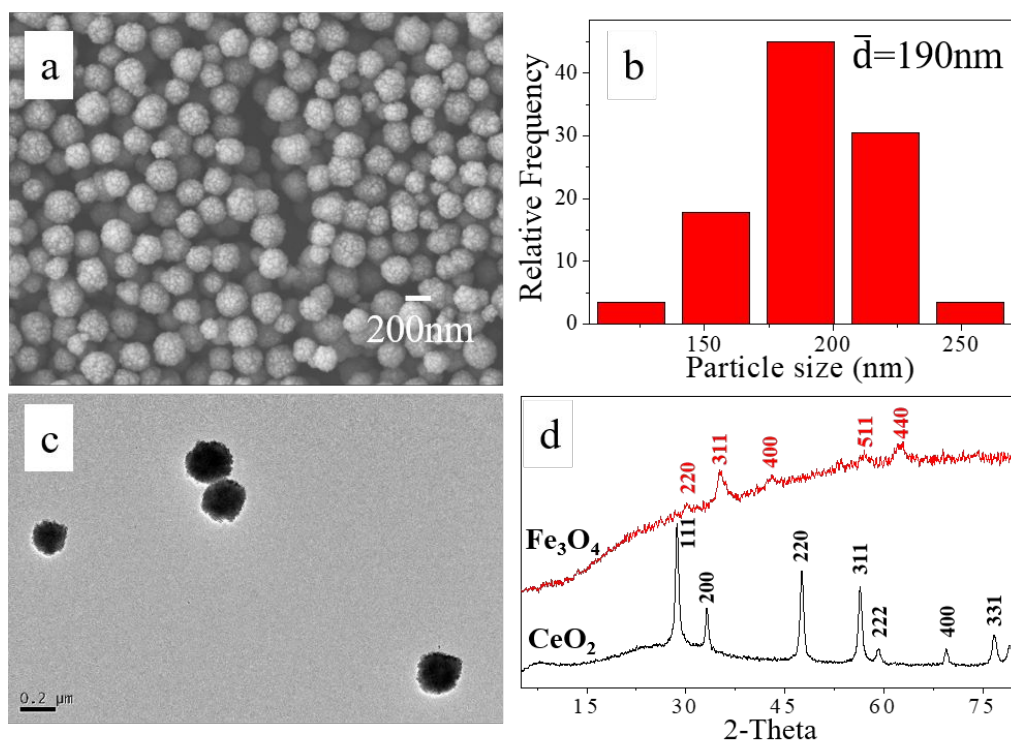

Figure S1. SEM image(a), particle size distribution(b) and TEM image(c) of Fe<sub>3</sub>O<sub>4</sub> cores, XRD pattern(d) of pure CeO<sub>2</sub> and Fe<sub>3</sub>O<sub>4</sub> cores.

## 2. Characterization of the $\text{Fe}_3\text{O}_4@\text{CeO}_2$ -PSF composite synthesized by different methods

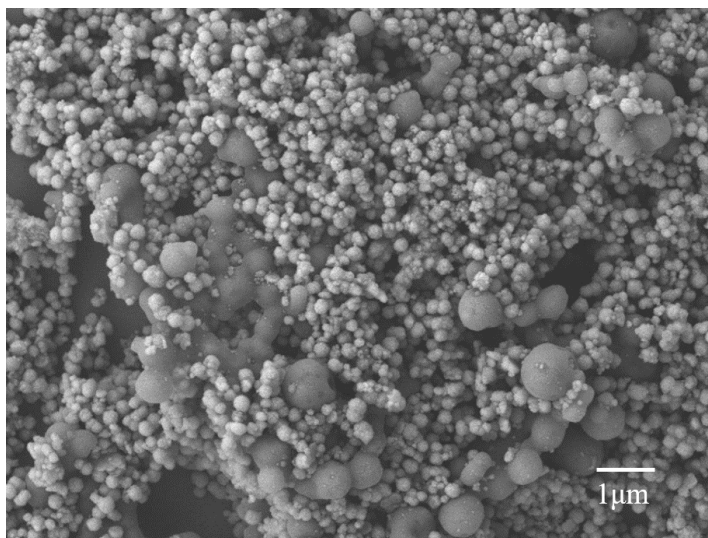

Figure S2. SEM images of  $\text{Fe}_3\text{O}_4@\text{CeO}_2$ -PSF particles synthesized by two-step phase-inversion method

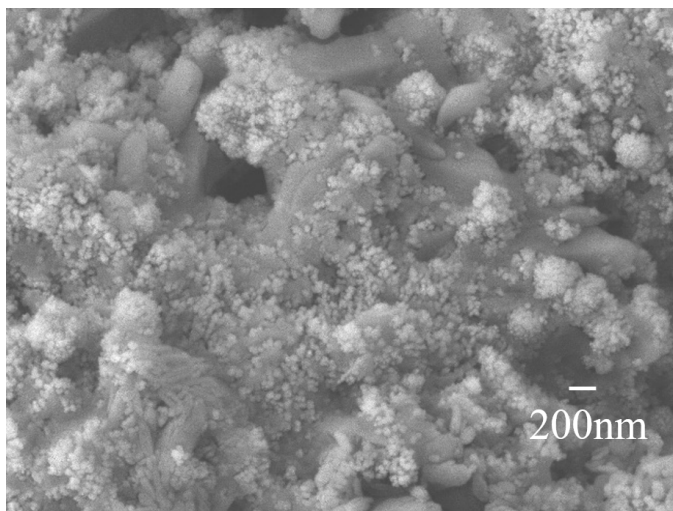

Figure S3. SEM images of  $\text{Fe}_3\text{O}_4@\text{CeO}_2$ -PSF particles synthesized by mixing two emulsion systems with SDS as emulsifier
